# Supplementary material
Source: PubMed Central journal article supplement (PMC3129844)
Supplement: supp_00630.2010_suppmat.pdf [file supp_00630.2010_suppmat.pdf]

Supplemental Table 1. Body weight and body composition in male R6/2 mice

| Genotype     | WT    |          |          |          | R6/2     |           |             |             |             |
|--------------|-------|----------|----------|----------|----------|-----------|-------------|-------------|-------------|
|              | Weeks | 4        | 8        | 10       | 12       | 4         | 8           | 10          | 12          |
| Body wt (g)  |       | 21.6±0.5 | 27.7±0.5 | 29.5±0.4 | 29.0±0.9 | 21.5±0.9  | 27.3±0.9    | 26.2±0.7*** | 25.6±0.6*** |
| Fat wt (g)   |       | 1.0±0.1  | 1.6±0.1  | 2.0±0.1  | 3.0±0.2  | 1.4±0.1** | 2.9±0.3***  | 3.1±0.3***  | 3.5±0.3     |
| Fat %        |       | 4.3±0.3  | 5.8±0.4  | 6.6±0.4  | 10.2±0.7 | 6.3±0.5** | 10.5±1.3*** | 11.8±1.3*** | 13.1±1.1*   |
| Lean wt (g)  |       | 17.4±0.4 | 21.6±0.4 | 23.0±0.3 | 21.2±0.6 | 16.7±0.6  | 19.8±0.8*   | 18.6±0.7*** | 17.3±0.2*** |
| Lean %       |       | 80.7±0.5 | 78.0±0.5 | 77.8±0.5 | 73.4±0.9 | 77.7±1.3* | 72.1±1.7*** | 70.9±1.6*** | 65.1±3.3*   |
| Fluid wt (g) |       | 1.7±0.0  | 2.0±0.0  | 2.3±0.0  | 2.2±0.1  | 1.7±0.1   | 2.2±0.1     | 2.1±0.1*    | 2.0±0.0*    |

N=8 for R6/2 TG and 20 for WT, \* $P < 0.05$ , \*\* $P < 0.01$ , and \*\*\* $P < 0.001$  vs. WT at the same age.

Supplemental Table 2. Body weight and body composition in female R6/2 mice

| Genotype     | WT       |          |          |          | R6/2     |             |           |             |
|--------------|----------|----------|----------|----------|----------|-------------|-----------|-------------|
|              | 4        | 8        | 10       | 12       | 4        | 8           | 10        | 12          |
| Body wt (g)  | 18.1±0.4 | 21.4±0.6 | 23.8±0.7 | 26.3±1.0 | 18.0±0.7 | 24.0±0.8*   | 23.3±0.8  | 22.2±0.6*** |
| Fat wt (g)   | 1.1±0.2  | 1.6±0.2  | 2.8±0.3  | 3.7±0.4  | 1.6±0.2  | 4.2±0.3***  | 3.5±0.3   | 2.5±0.3*    |
| Fat %        | 5.4±1.1  | 7.4±0.8  | 11.6±1.0 | 13.2±1.2 | 8.4±0.7* | 16.9±0.9*** | 14.7±0.8* | 11.0±0.9    |
| Lean wt (g)  | 14.3±0.3 | 16.1±0.4 | 17.0±0.3 | 18.0±0.4 | 13.8±0.4 | 15.6±0.3    | 15.9±0.4* | 15.8±0.3*** |
| Lean %       | 79.2±1.0 | 75.2±0.8 | 71.7±0.9 | 69.0±1.5 | 77.1±1.0 | 65.5±1.1*** | 68.9±0.9* | 71.6±0.9    |
| Fluid wt (g) | 1.6±0.0  | 1.8±0.1  | 2.0±0.1  | 2.3±0.1  | 1.6±0.1  | 2.1±0.1     | 2.1±0.1   | 1.9±0.1***  |

N=16 for R6/2 TG and 12 for WT, \* $P < 0.05$ , \*\* $P < 0.01$ , and \*\*\* $P < 0.001$  vs. WT at the same age.

# Supplemental material Figure 1

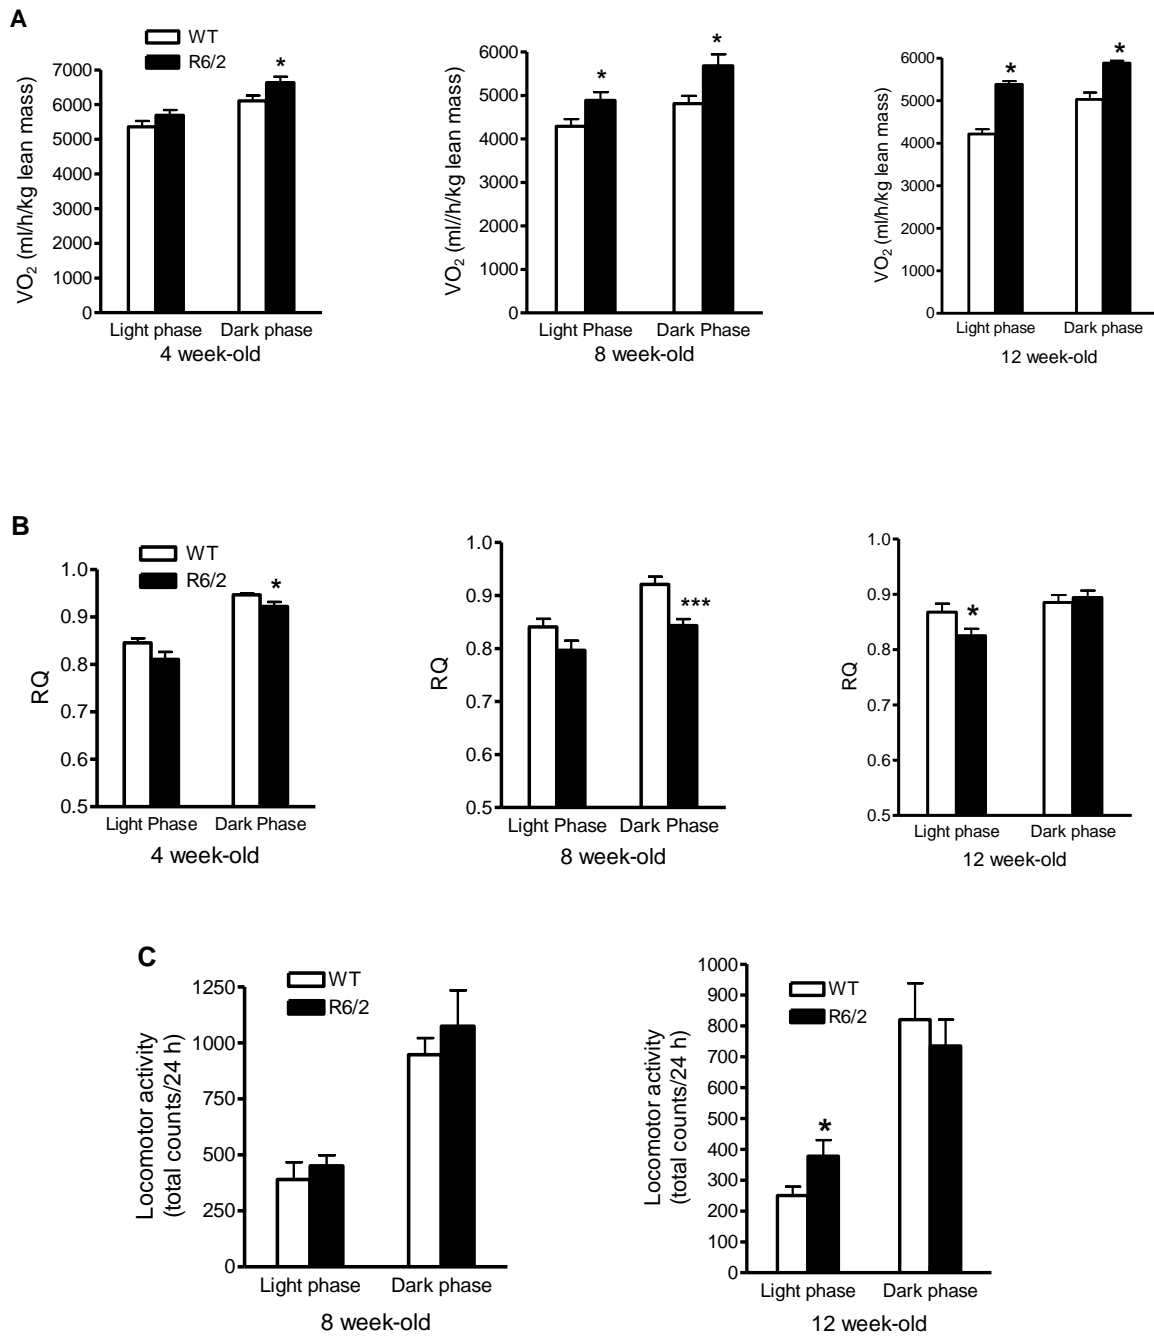

## Supplemental material Figure 2

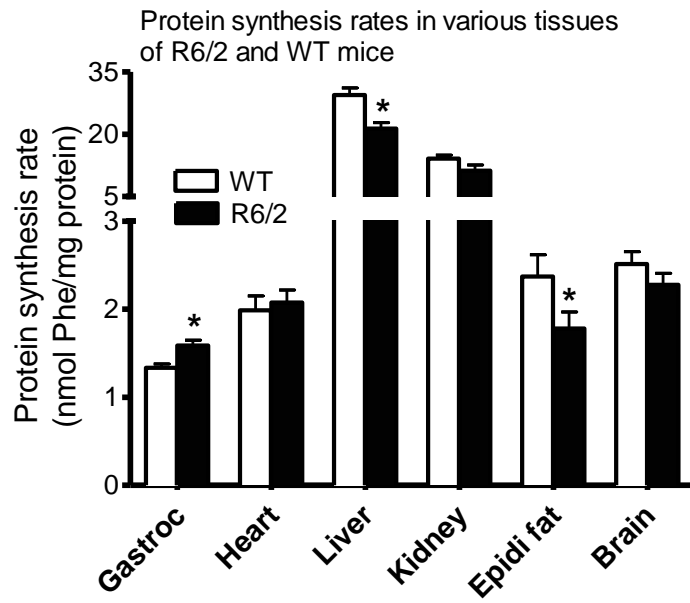

Supplemental material Figure 3

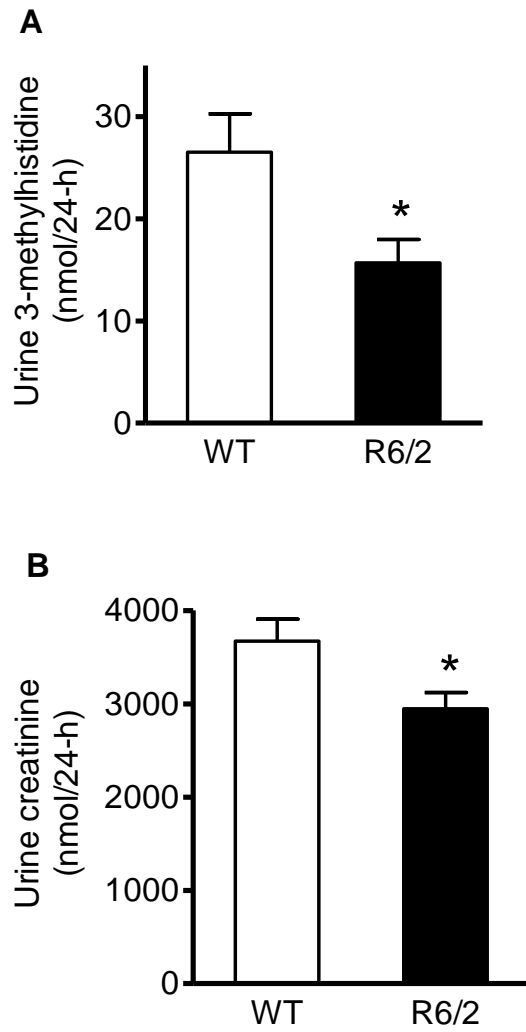

Supplemental material Figure 4

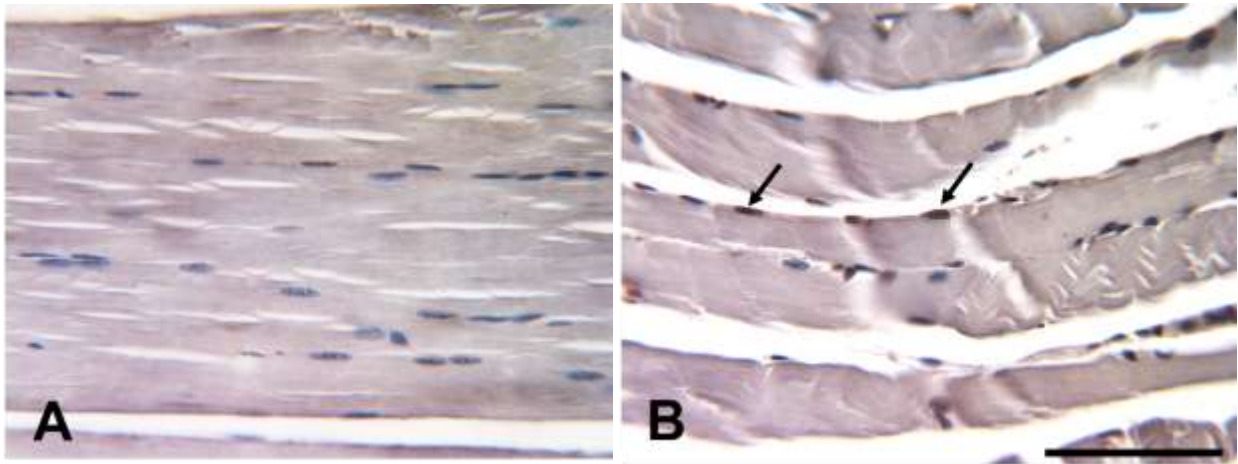

C

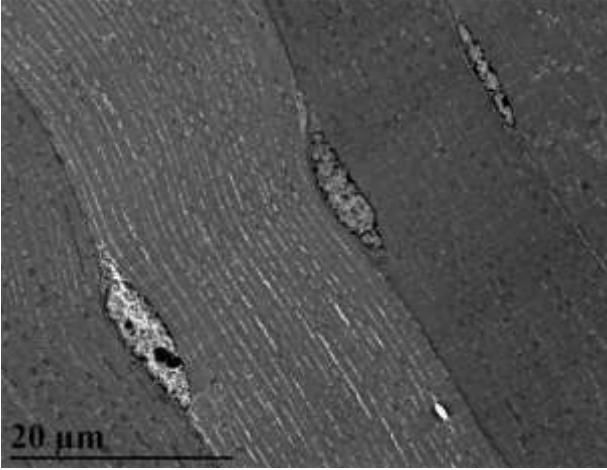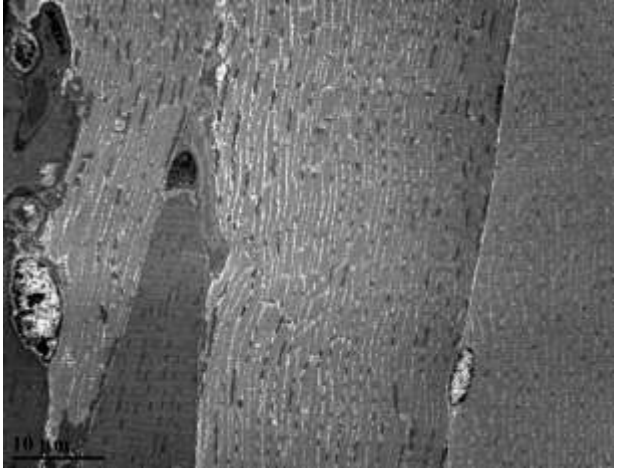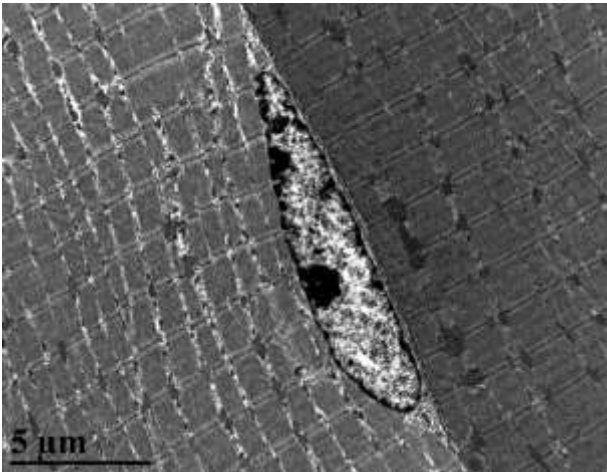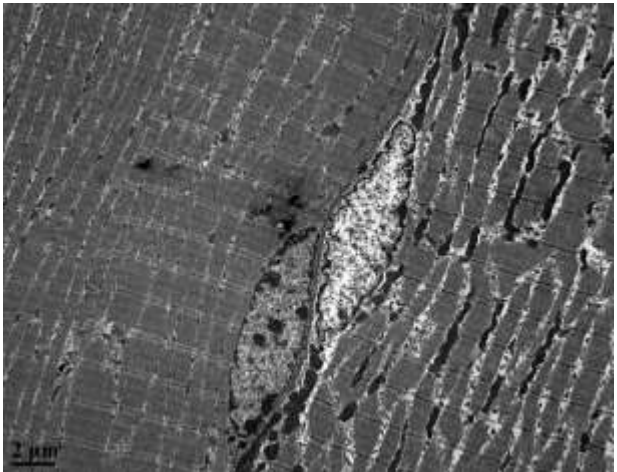

## Supplemental material figure legends

Fig. 1 Oxygen consumption (A), RQ (B), and locomotor activity (C) in R6/2 and WT mice. \*  $P < 0.05$  vs. WT control, n=8-10.

Fig. 2. Protein synthesis rates in various tissues of R6/2 and WT mice. \*  $P < 0.05$  vs. WT control, n=10/group.

Fig. 3. Twenty hour-hr urinary secretion of 3-methylhistidine and creatinine in n R6/2 and WT mice. \*  $P < 0.05$  vs. WT control, n=10 for WT and 9 for R6/2 mice.

Fig. 4. TUNEL assay and electron micrographs of longitudinal or oblique sections of gastrocnemius muscle fibers of R6/2 mice. Representative fields of TUNEL stained gastrocnemius muscle sections. A. Control mouse. B. Knockout mouse. Note the prevalence of TUNEL+ skeletal muscle nuclei (brown; arrows) in B. Nuclei are counterstained blue. Scale bar represents 50 $\mu$ m. Representative electron micrographs of gastrocnemius sections of 12 weeks of age R6/2 (C). EM pictures with different magnifications and abnormal myocytes flanked by relatively normal myocytes in R6/2 mice were shown. n=2.
